# Supplementary material for: Quantum simulations of thermally activated delayed fluorescence in an all-organic emitter
Source: Royal Society of Chemistry journal article supplement (doi:10.1039/d2cp01147f), 2022-01-01
Supplement: d2cp01147f1.pdf [file d2cp01147f1.pdf]

– Supplementary Information for PCCP –

**Quantum simulations of thermally activated delayed fluorescence in an all-organic emitter**

Tommaso Francese, Arpan Kundu, Francois Gygi and Giulia Galli

**Supplementary Sections List:**

**S1. Molecule: Autocorrelation function of dihedral angle**

**S2. Molecule: Pairwise Root-Mean Square Deviation (RMSD)**

**S3. Solid: Distributions of dihedral angles obtained at the PBE and SCAN level of theory**

**S4. Solid: Autocorrelation function of dihedral angles**

**S5. Solid: Pairwise Root-Mean Square Deviation (RMSD)**

**S6. Vibrational Density of States (VDOS)**

**S7. Intersystem Crossing (ISC) and *reverse* Intersystem Crossing (*r*ISC) Data Summary**

**S8. Molecule: HOMO-LUMO Gap Distribution at the PBE Level of theory**

**S9. Molecule:  $\Delta E_{ST}$  and  $f_{OS}$  distributions for the Classical (CL) and Quantum (QT) sampled configurations at PBE level**

**S10. Solid: HOMO-LUMO gap as a function of temperature at T=0 K and T=300 K for the high packing fraction system at PBE level.**

**S11.  $f_{OS}$  for the Classical sampled configuration and  $f_{OS}$  for the Quantum sampled configurations at PBE level**

**S12. Solid: Polar graph distribution of the  $\Delta E_{ST}$  for the sampled solid-state configurations from the FPMD and QTMD trajectories calculated at B3LYP level**

**S13. Solid: Potential transitions at PBE level**

**S14. Cartesian coordinates of the  $S_0$  optimized structure of the NAI-DMAC in the gas phase limit**

**S15. Cartesian coordinates of the  $S_0$  optimized structure of the NAI-DMAC in the high packing fraction limit**

## S1. Molecule: Autocorrelation function of dihedral angle

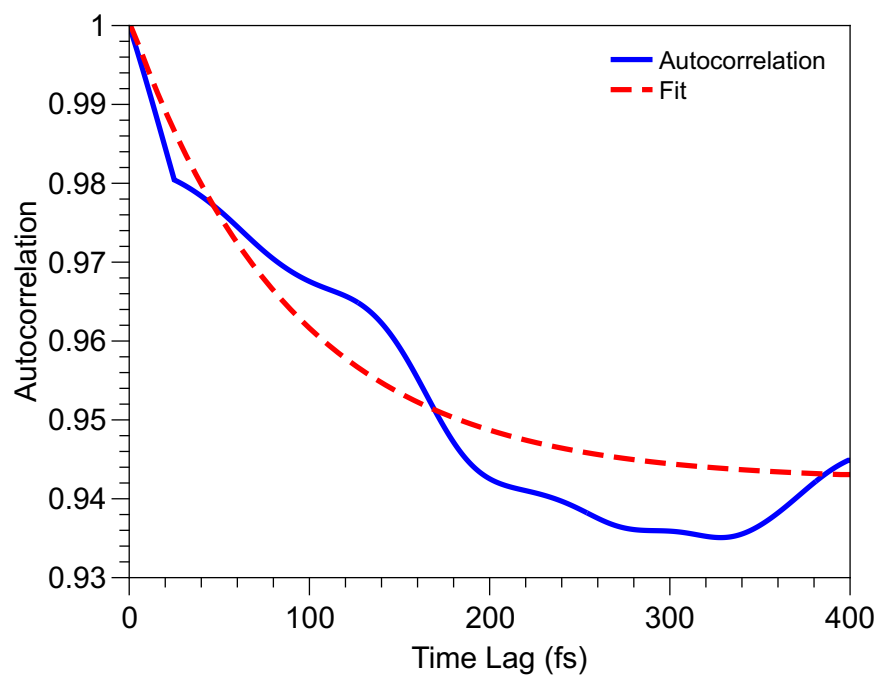

**Supplementary Figure 1.** Dihedral angle autocorrelation function for a molecular trajectory at T=300 K. The autocorrelation curve was fitted with an exponential decay of the form  $\exp(-x/\tau)$ . The resulting  $\tau$  is  $43.6 \pm 2.2$  fs, which corresponds to  $\approx 90$  molecular dynamics (MD) steps, where the time-step in our simulations is  $\approx 0.4838$  fs. Hence by sampling configurations every 90 MD steps or more we obtain a set of statistically non-correlated samples.

## S2. Molecule: Pairwise Root-Mean Square Deviation (RMSD)

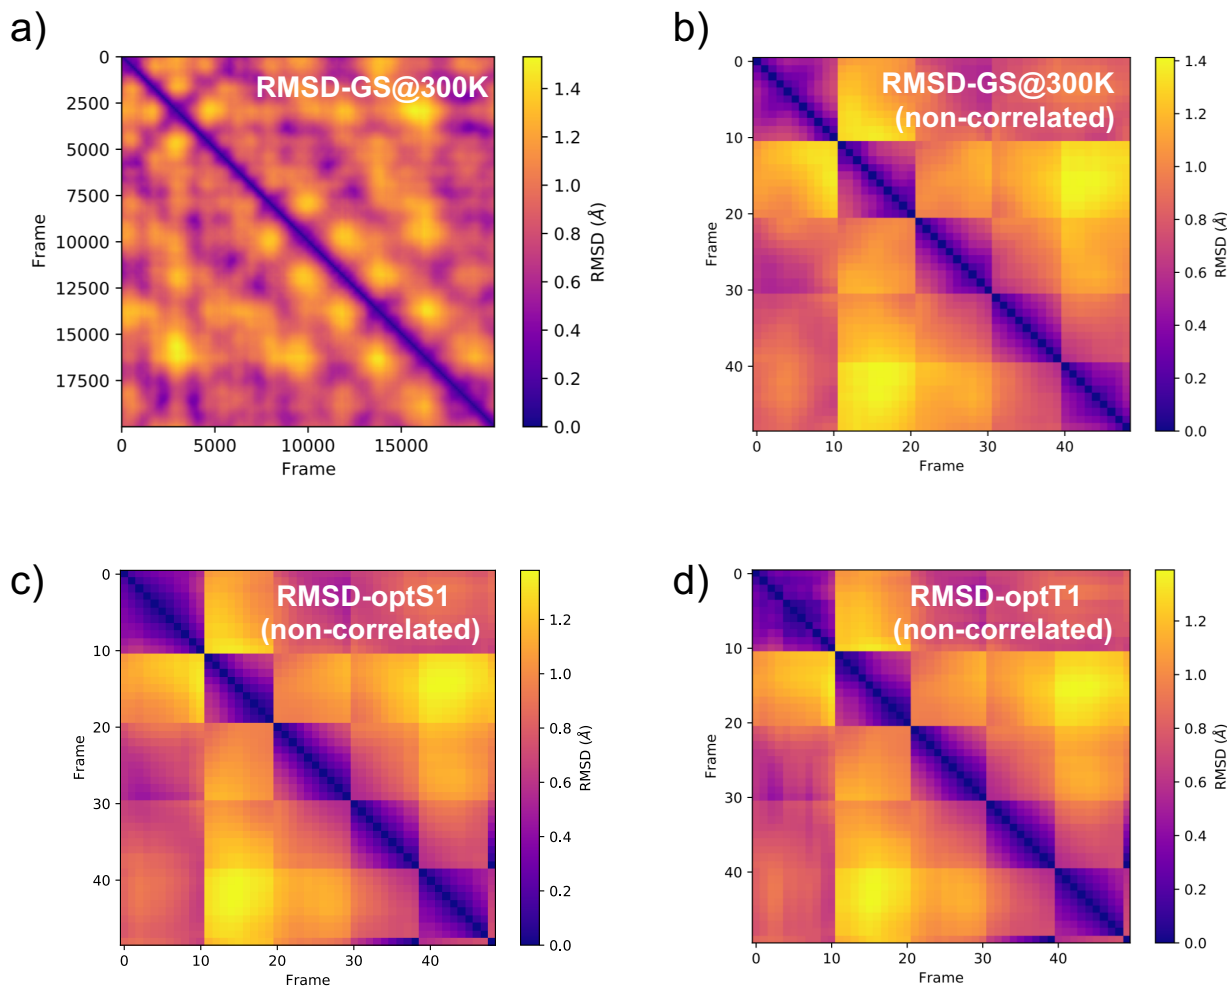

**Supplementary Figure 2.** The pairwise Root Mean Square Deviation (RMSD)<sup>1,2</sup> computed for a trajectory of 20000 first principles molecular dynamics (FPMD) steps at 300 K. a) Off diagonal regions of low RMSD between two structures suggest that the trajectory is revisiting previously explored states, a necessary condition for obtaining good statistical averages. The same analysis is shown in b) for non-correlated configurations directly extracted from the trajectory at T=300 K (= 50 configurations), showing the occupation of different states as blocks of similar RMSD values along the diagonal. In c) and d) we show the same analysis for the excited state S<sub>1</sub> and T<sub>1</sub> optimized configurations, respectively.

### S3. Solid: Distributions of dihedral angles obtained at the PBE and SCAN level of theory

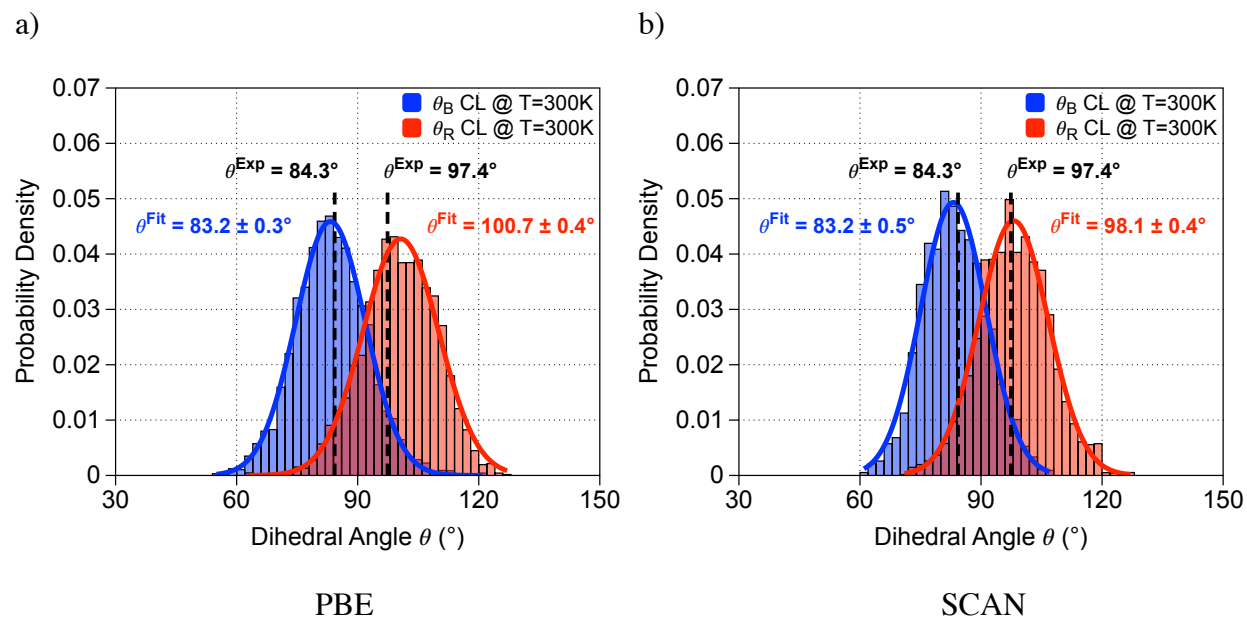

**Supplementary Figure 3.** Probability distribution of the torsion angles ( $\theta$ ) distributions at finite temperature obtained on classical trajectories at 300 K. Results obtained at the a) PBE and b) SCAN level of theory.

## S4. Solid: Autocorrelation function of dihedral angles

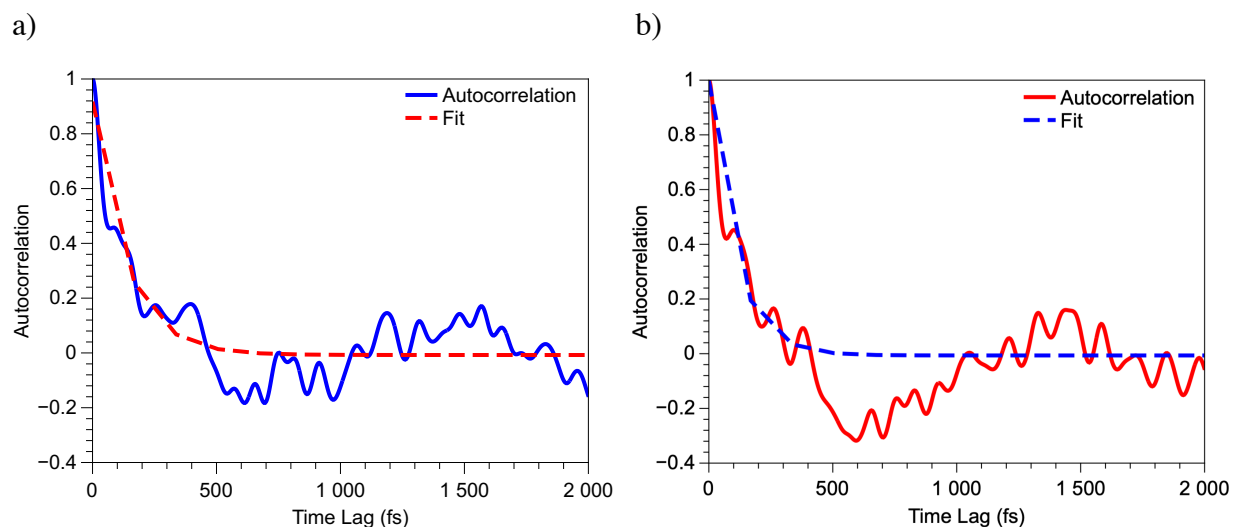

**Supplementary Figure 4.** Dihedral angle autocorrelation function for a solid trajectory at  $T=300$  K. The autocorrelation curve was fitted with an exponential decay of the form  $\exp(-x/\tau)$ . The autocorrelation functions are reported for the pairs of molecules a) #1 (blue solid line) and b) #3 (red solid line) [see Fig. 2 in the main text]. The resulting  $\tau$  for molecule #1 is  $65 \pm 1$  fs, which corresponds to  $\approx 134$  molecular dynamics (MD) steps and  $\tau$  for molecule #2 is  $51 \pm 1$  fs, which corresponds to  $\approx 105$  MD steps. The time-step in our simulations is  $\approx 0.4838$  fs. We sampled configurations every 250 steps, generating an ensemble of 84 configurations (see main text)

## S5. Solid: Pairwise Root-Mean Square Deviation (RMSD)

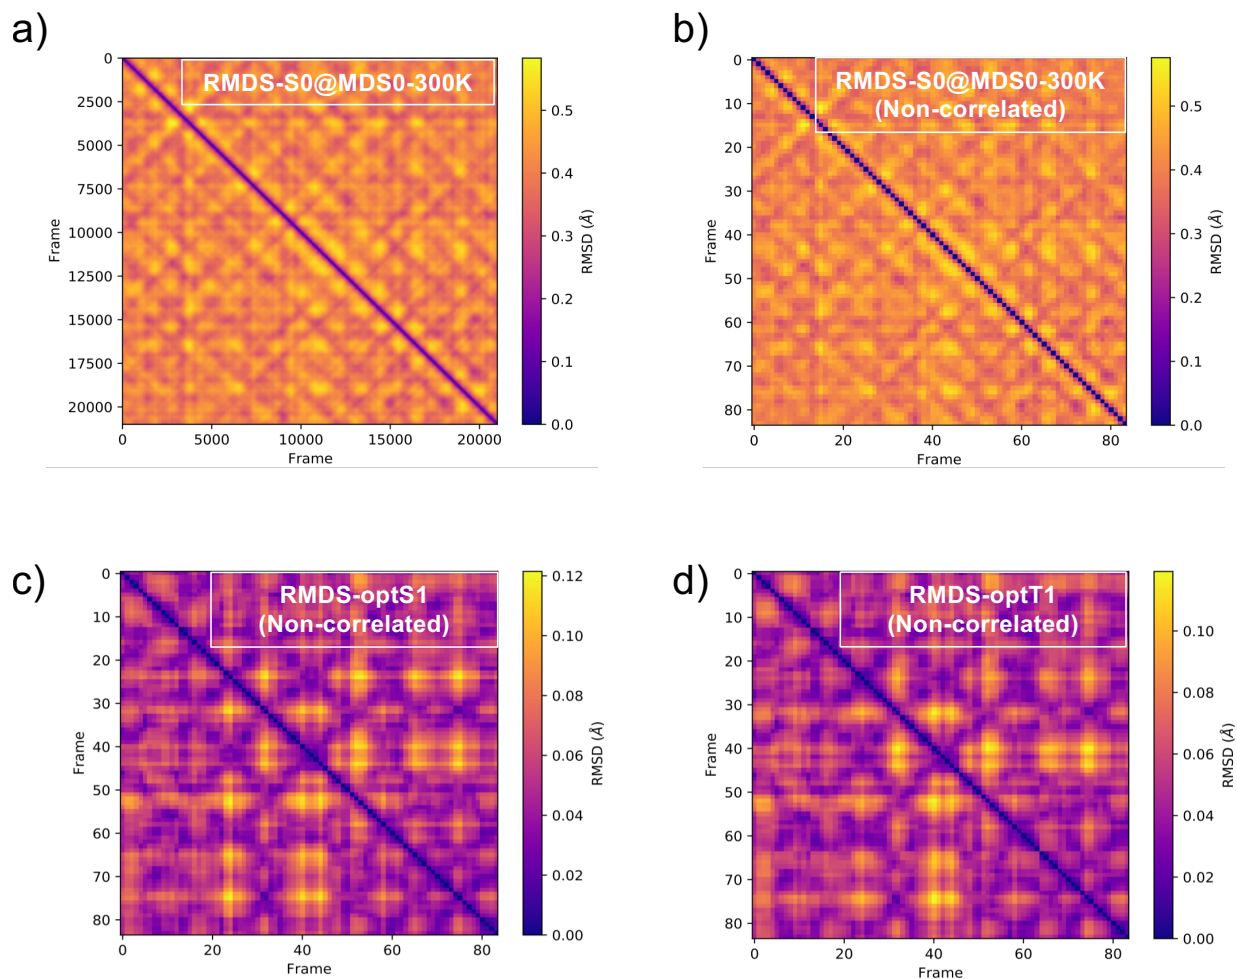

**Supplementary Figure 5.** The pairwise Root Mean Square Deviation (RMSD)<sup>1,2</sup> computed for a trajectory of 21000 first principles molecular dynamics (FPMD) steps at 300 K a) Off diagonal regions of low RMSD between two structures suggest that the trajectory is revisiting previously explored states, a necessary condition for obtaining good statistical averages. The same analysis is shown in b) for non-correlated configurations directly extracted from the trajectory at T=300 K (84 configurations), showing the occupation of different states as blocks of similar RMSD values along the diagonal. In c) and d) we show the same analysis for the excited state S<sub>1</sub> and T<sub>1</sub> optimized configurations, respectively.

## S6. Vibrational Density of States (VDOS)

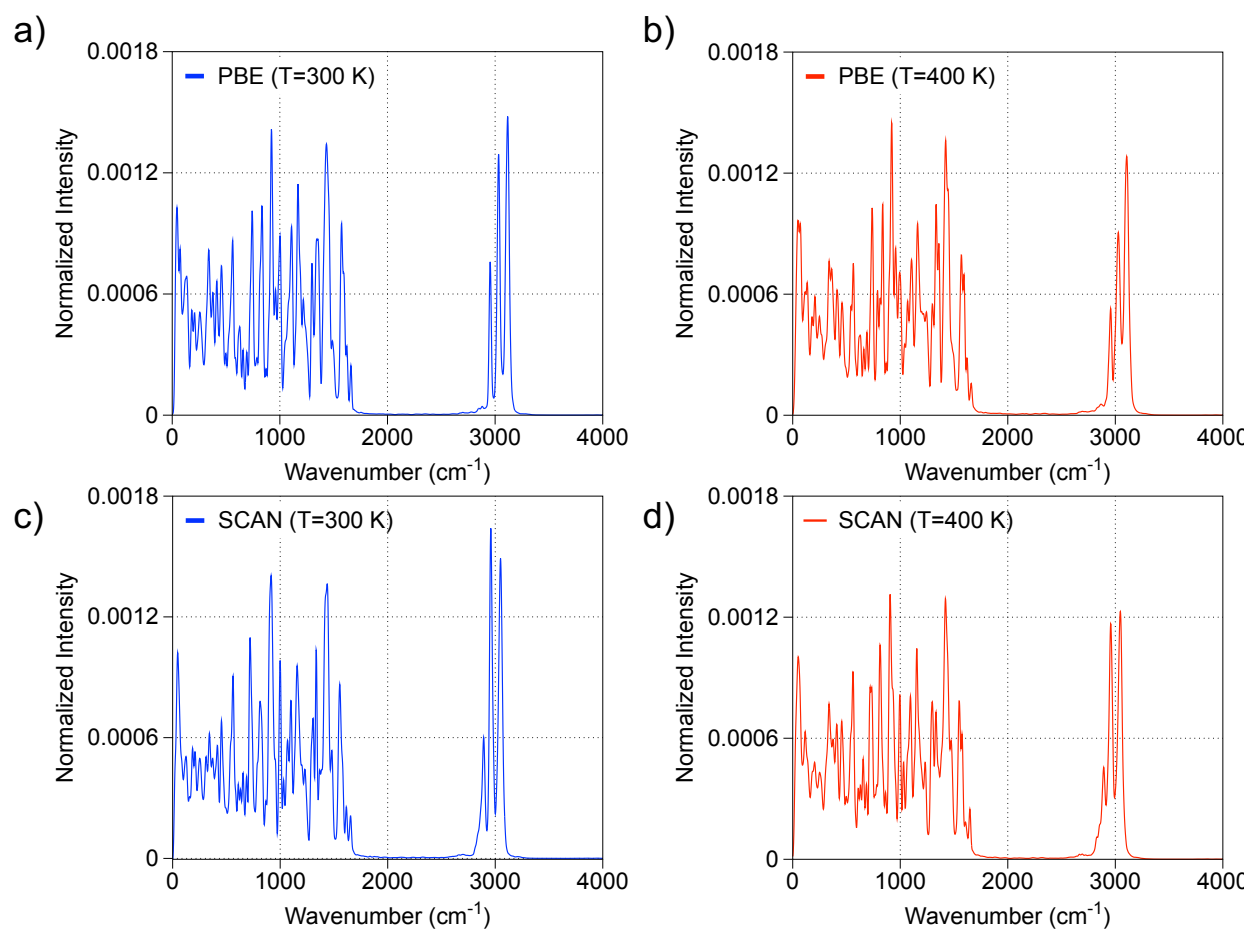

**Supplementary Figure 6.** The Vibrational Density of States<sup>3-5</sup> (VDOS) calculated for the solid at the PBE and SCAN level of theory at T=300 K are reported in the a) and c) panels, respectively, while the VDOS at T=400 K are reported in b) and d) panels, respectively. The results show that PBE and SCAN yield a similar description of low frequency modes and that temperature has a weak influence on the spectra between 300 and 400 K.

## S7. Intersystem Crossing (ISC) and reverse Intersystem Crossing (rISC) Data Summary

The direct and reverse intersystem crossing rates between an initial state  $\Psi_i$  (e.g., singlet) and a final state  $\Psi_f$  (e.g., triplet) were computed with the ORCA code<sup>6</sup>. We report “*verbatim*” the explanation about the rates’ calculation given in the Orca manual (newest version v5.0.2, Section 9.39):

“Intersystem crossing (ISC) rate between a given initial state  $i$  and a final state  $f$  can be calculated from Fermi’s Golden rule:

$$k(\omega)_{if} = \frac{2\pi}{\hbar} |\langle \Psi_f | \hat{H}_{SO} | \Psi_i \rangle|^2 \delta(E_i - E_f),$$

which is quite similar to the Equation

$$k(\omega)_{if} = \frac{4\omega^3 n^2}{3\hbar c^3} |\langle \Psi_i | \hat{\mu} | \Psi_f \rangle|^2 \delta(E_i - E_f \pm \hbar\omega)$$

[...] for Fluorescence, except for the frequency term. The same trick used there can be applied here to switch to the time domain. Then, we are left with a simple time integration, which is not any more difficult to solve than the equations above [...]. Orca can use all the infrastructure already presented to compute these ISC rates, including Duschinsky rotation, vibronic coupling effects, use of different coordinate systems and so on. Right now, its use is optimized for CIS/TDDFT [...], but it can be applied in general by combining simpler methods to obtain the geometries and Hessians with more advanced methods to compute the SOC matrix elements, when needed.”

The Hessian for the initial and final states of every configuration used to estimate the ISC/rISC has been calculated in Orca, starting from the geometries employed obtained from Qbox, after a careful convergence was achieved, both in  $S_1$  and  $T_1$  states. Once Hessians from these geometries in Orca were obtained and employing the total energy differences obtained from Qbox @B3LYP level as input parameter, the non-radiative rates were calculated. In every calculation of the rates the SOC matrix elements and vibrational effects were properly included in order to account for the vibrational effects relevant for light atom elements.

The full set of equations used by Orca for estimating the rates and the methodology therein are reported in the Orca manual (newest version 5.0.2), and in “*de Souza, Neese and Izsak, J. Chem. Phys. 148, 034104 (2018)*” and “*de Souza, Farias, Neese and Izsak, J. Chem. Theory Comput., 15, 3, 1896-1904, (2019)*”, respectively.



|                   |                    |                     | <b>I</b>             | <b>II</b>                | <b>III</b>               | <b>IV</b>            |
|-------------------|--------------------|---------------------|----------------------|--------------------------|--------------------------|----------------------|
|                   | $k_{ISC} [s^{-1}]$ | $k_{rISC} [s^{-1}]$ | $k_{rISC} / k_{ISC}$ | $\theta@optS_1 [^\circ]$ | $\theta@optT_1 [^\circ]$ | $\Delta E_{ST} [eV]$ |
| Exp. <sup>7</sup> | $2.50 \times 10^7$ | $4.50 \times 10^5$  | 0.02                 | -                        | -                        | -                    |
| a)                | $2.93 \times 10^6$ | $5.63 \times 10^5$  | 0.20                 | 80.9                     | 75.3                     | 0.28                 |
| b)                | $4.70 \times 10^5$ | $1.43 \times 10^5$  | 0.30                 | 63.0                     | 62.7                     | 0.32                 |
| c)                | $5.80 \times 10^6$ | $8.32 \times 10^4$  | 0.01                 | 73.9                     | 73.9                     | 0.13                 |

**Supplementary Table S1.** Comparison between experimental and theoretical intersystem crossing ( $k_{ISC}$ ) and reverse intersystem crossing ( $k_{rISC}$ ) rates for three configurations: a) equilibrated gas phase molecule at T=0 K, b) a molecule extracted from first principles molecular dynamics trajectories for the molecule at T=300 K, and c) a molecule extracted from first principles molecular dynamics trajectories for the solid at T=300 K which displayed the largest value of the oscillator strength  $f_{OS}$ . These rates are all estimated in ‘gas phase conditions’, *i.e.*, without accounting for any effect from solvent/embedding matrices. In **I** we show the ratio between  $rISC$  and  $ISC$  rates; in **II**) the dihedral angle of each optimized model in the singlet excited state ( $S_1$ ); in **III**) the dihedral angle of each optimized model in the triplet excited state is reported ( $T_1$ ) and in **IV**) the energy difference between the singlet and triplet state  $\Delta E_{ST}$ .

| $f_{OS} (Solid) / f_{OS} (Gas)$ | Absorption | Emission@optS1 | Emission@optT1 |
|---------------------------------|------------|----------------|----------------|
| @PBE                            | 0.3        | 0.2            | 0.1            |
| @B3LYP                          | 0.3        | 0.3            | 0.2            |

**Supplementary Table S2.** Ratio of the oscillator strength ( $f_{OS}$ ) between high packing (solid)- and gas phase (molecule) limits computed at the PBE and B3LYP level of theory., computed for the singlet ( $S_1$ ) and triplet ( $T_1$ ) states in emission and absorption, at optimized (opt) geometries.

## S8. Molecule: HOMO-LUMO Gap Distribution at the PBE Level of theory

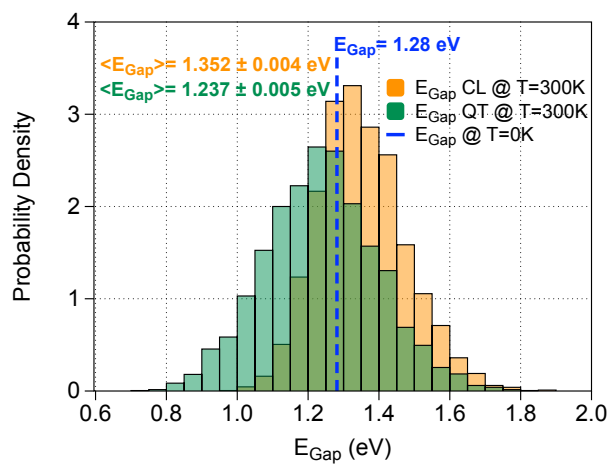

**Supplementary Figure 7.** Probability distributions of the HOMO-LUMO Gap ( $E_{\text{Gap}}$ ) of the isolated molecule at 300K as obtained on classical (CL) and quantum (QT) trajectories at the PBE level of theory. Averages values are indicated.

**S9. Molecule:  $\Delta E_{ST}$  and  $f_{OS}$  distributions for the Classical (CL) and Quantum (QT) sampled configurations at PBE level**

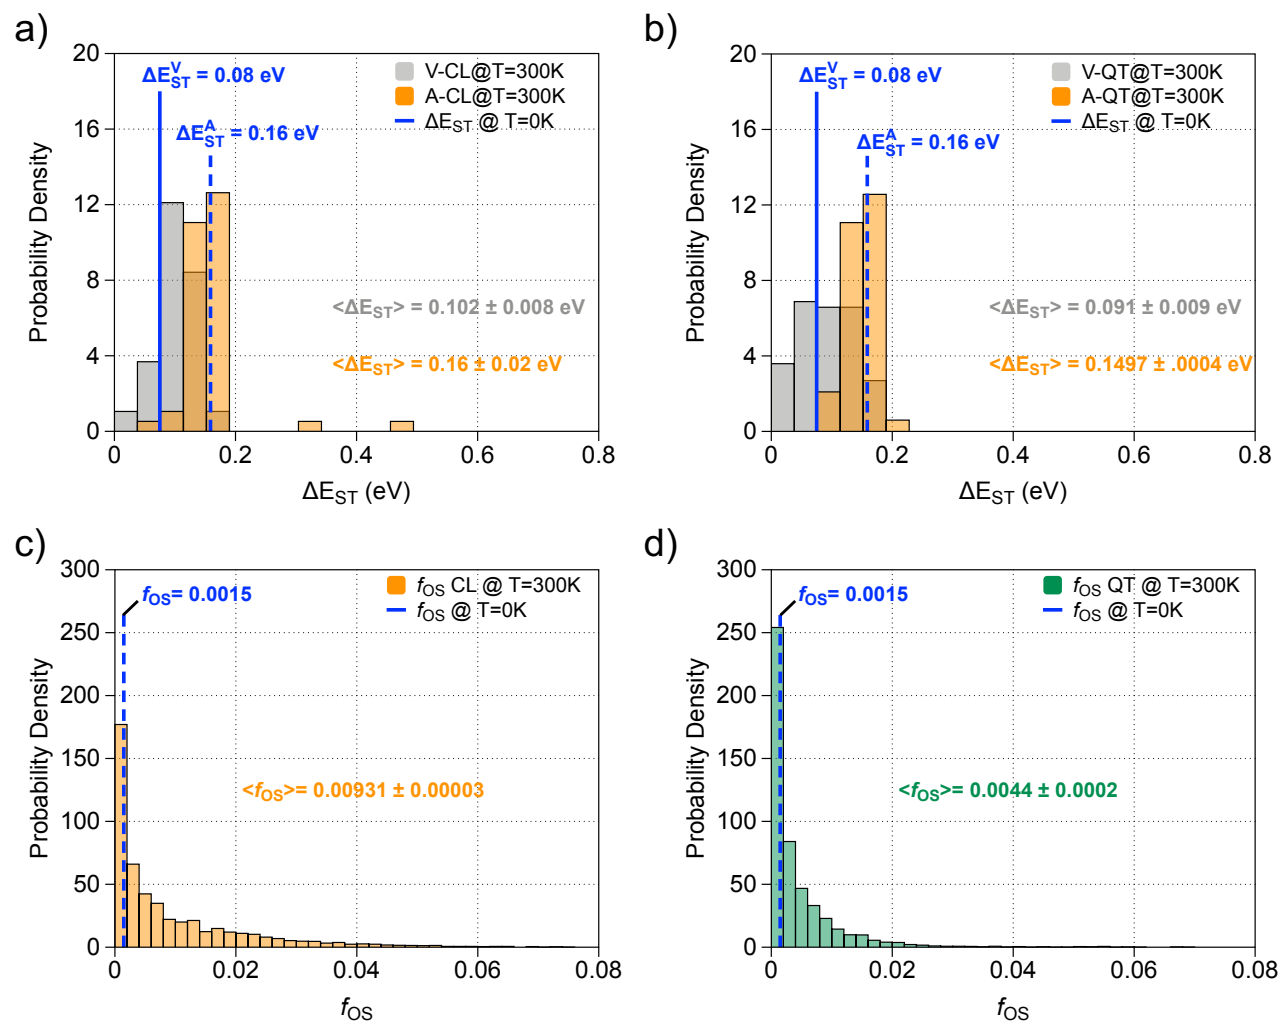

**Supplementary Figure 8.** Probability distribution of the vertical (V) and adiabatic (A) singlet-triplet energy difference ( $\Delta E_{ST}$ ) at 300 K for classical (a) and quantum mechanical (b) trajectories. Probability distribution of the oscillator strength ( $f_{OS}$ ) between HOMO and LUMO states of the molecule at 300 K computed on classical (c) and quantum (d) trajectories. The results shown in blue correspond to the values at T=0 K. All data obtained at the PBE level of theory.

**S10. Solid: HOMO-LUMO gap as a function of temperature at T=0 K and T=300 K for the high packing fraction system at PBE level.**

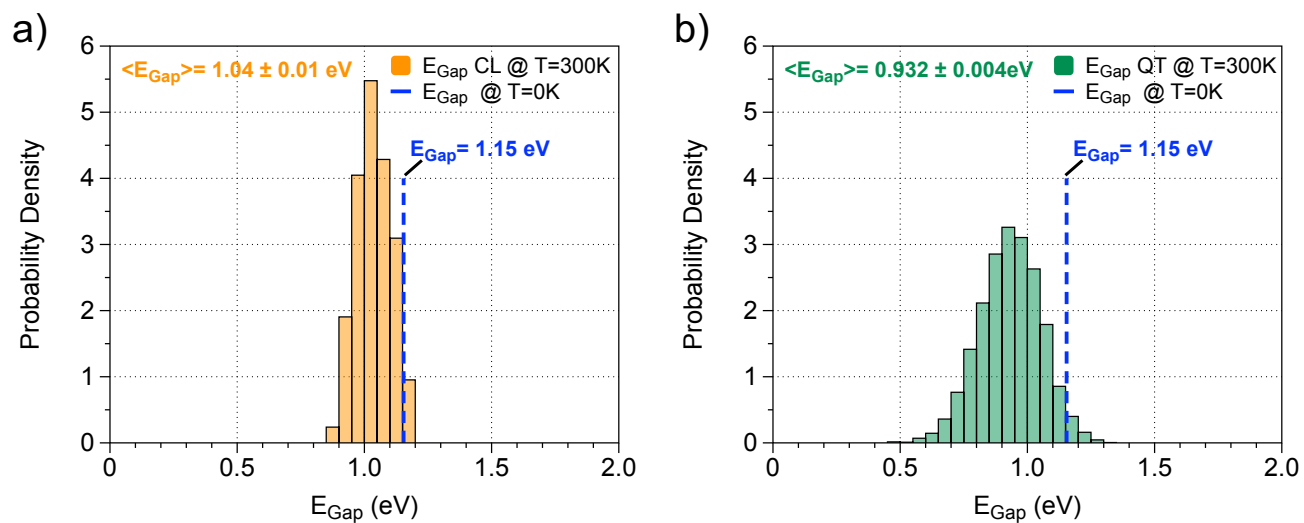

**Supplementary Figure 9.** Probability distributions of the HOMO-LUMO gap obtained on classical (a) and quantum (b) trajectories at 300 K for the solid. Results obtained at the PBE level of theory.

**S11.  $f_{os}$  for the Classical sampled configuration and  $f_{os}$  for the Quantum sampled configurations at PBE level**

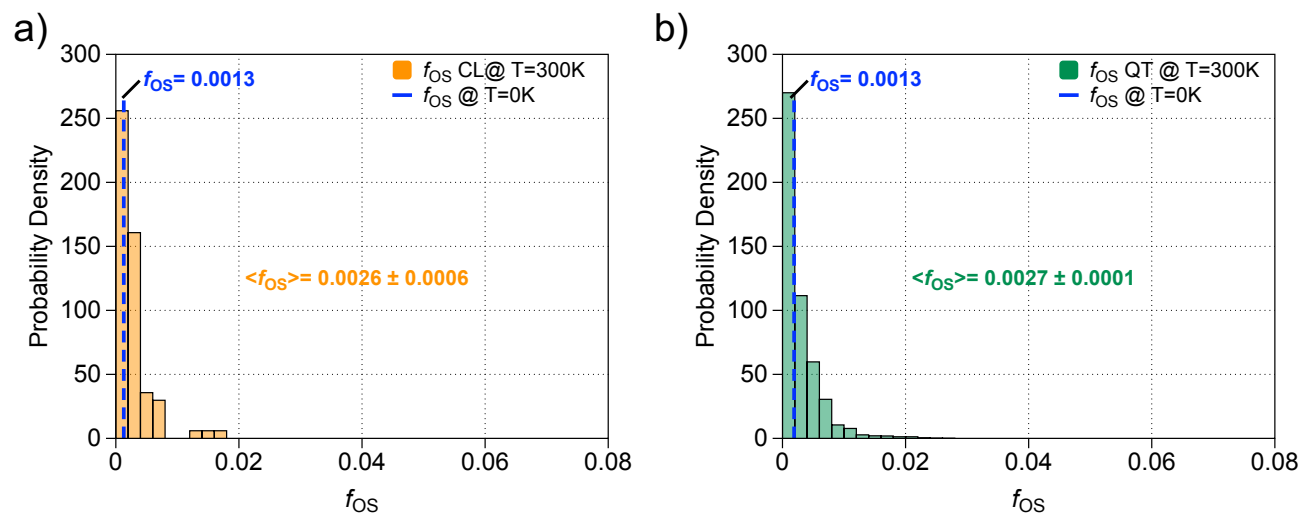

**Supplementary Figure 10.** Oscillator strength ( $f_{os}$ ) in the solid at finite temperature.  $f_{os}$  distribution calculated for classical (a) and quantum (b) trajectories at 300 K. Results obtained at the PBE level of theory.

**S12. Solid: Polar graph distribution of the  $\Delta E_{ST}$  for the sampled solid-state configurations from the FPMD and QTMD trajectories calculated at B3LYP level**

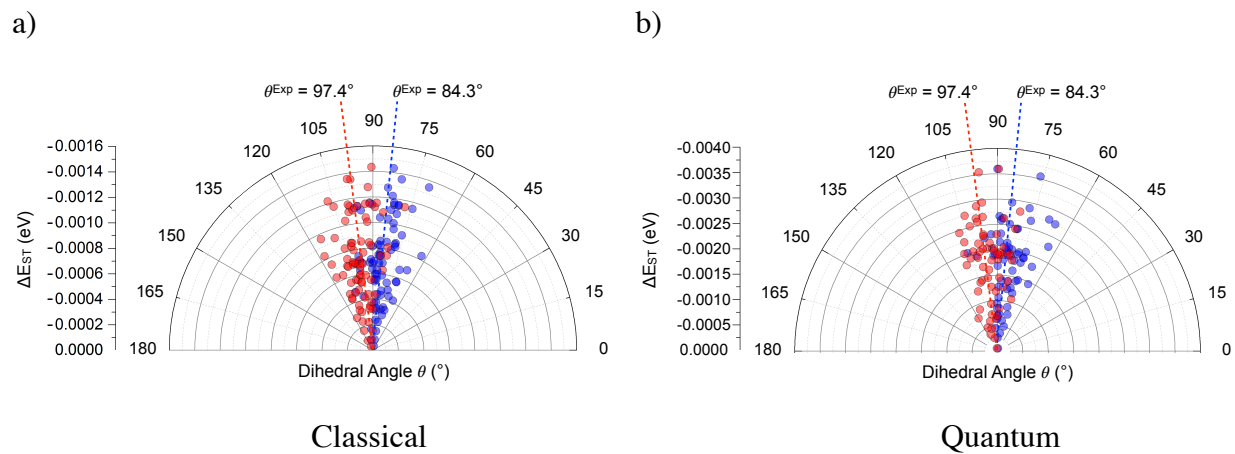

**Supplementary Figure 11.** Distribution of the energy difference between singlet and triplet ( $\Delta E_{ST}$ ) as a function of the torsion angle  $\theta$  angle of the 'blue' and 'red' pair of molecules (see Figure 2b of the main text for definition of the two pairs of molecules). a) the  $\Delta E_{ST}$  vs  $\theta$  for classical trajectories and b) the  $\Delta E_{ST}$  vs  $\theta$  for quantum trajectories.

### S13. Solid: Potential transitions at PBE level

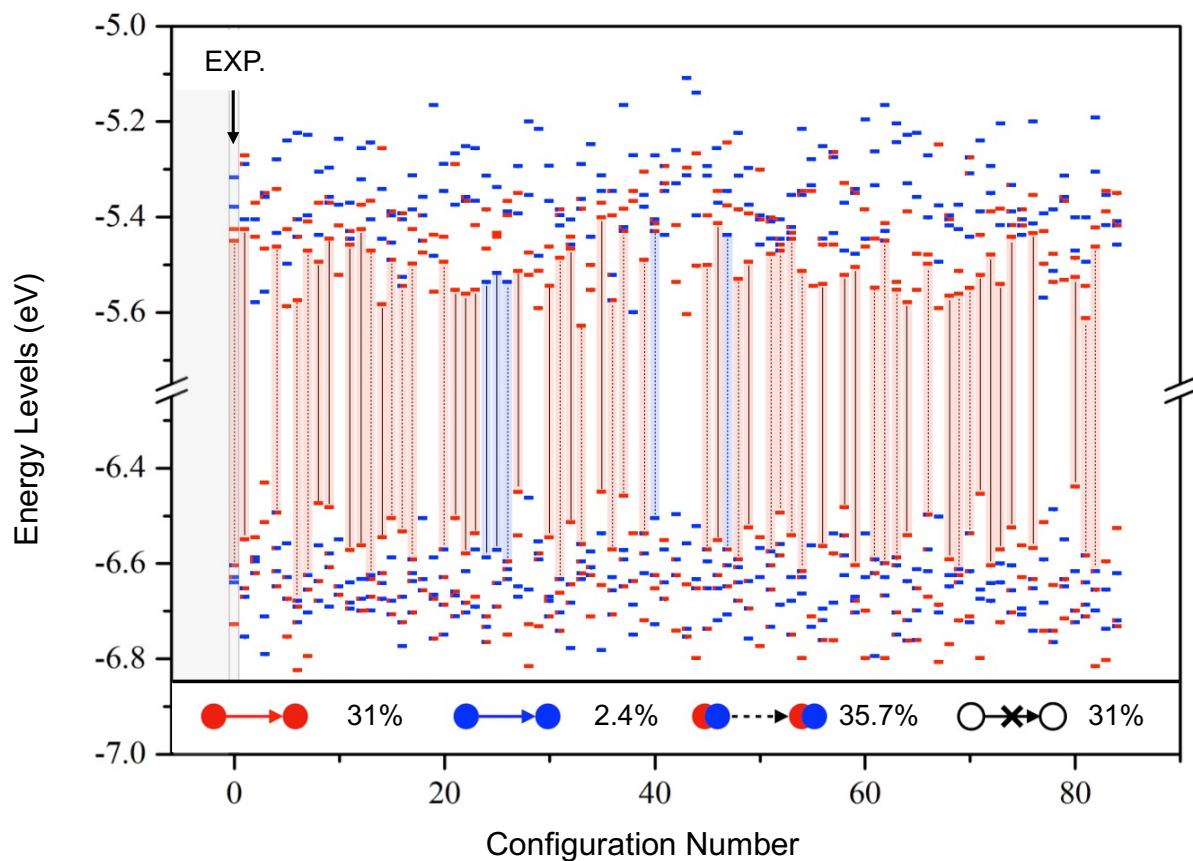

**Supplementary Figure 12.** The HOMO-LUMO transitions are represented in blue (solid black line with blue contour) when they occur between levels localized on pair 1-2, and in red (solid black line with red contour), when they occur between levels localized on pair 3-4 (see Fig. 2 of the main text for the definition of the pairs of molecules). Mixed transitions are indicated by dashed lines with blue or red contour. The relative percentages of each transition over the whole trajectory are reported at the bottom of the graph. These transitions have been calculated at the PBE level of theory.

### S14. Cartesian coordinates of the $S_0$ optimized structure of the NAI-DMAC in the gas phase limit

73

XYZ file

|   |           |           |           |
|---|-----------|-----------|-----------|
| C | 11.766409 | 10.814050 | 12.402004 |
| C | 12.587904 | 11.619721 | 13.215137 |
| C | 13.970485 | 12.100214 | 12.775286 |
| C | 14.307940 | 11.617499 | 11.364817 |
| C | 13.427602 | 10.829289 | 10.596981 |
| C | 13.796862 | 10.443308 | 9.294465  |
| C | 15.023335 | 10.812462 | 8.759520  |
| C | 15.908913 | 11.579346 | 9.512168  |
| C | 15.535473 | 11.969666 | 10.793941 |
| C | 12.107094 | 11.974958 | 14.479976 |
| C | 10.866809 | 11.563206 | 14.956500 |
| C | 10.070556 | 10.757639 | 14.146701 |
| C | 10.515699 | 10.385258 | 12.885989 |
| C | 15.030373 | 11.557173 | 13.764793 |
| C | 14.001335 | 13.648057 | 12.798305 |
| C | 11.330526 | 9.598583  | 10.327577 |
| C | 10.297626 | 10.179936 | 9.536351  |
| C | 9.454224  | 9.311345  | 8.774654  |
| C | 9.669228  | 7.913207  | 8.803283  |
| C | 10.688687 | 7.385406  | 9.576410  |
| C | 11.511875 | 8.227697  | 10.340013 |
| C | 10.069285 | 11.575535 | 9.474491  |
| C | 9.047604  | 12.086720 | 8.700569  |
| C | 8.211822  | 11.230989 | 7.962209  |
| C | 8.408252  | 9.861320  | 7.994965  |
| C | 8.814872  | 6.996302  | 8.010205  |
| C | 7.506746  | 8.982991  | 7.211465  |
| C | 6.906448  | 6.726898  | 6.512052  |
| C | 5.759986  | 6.205817  | 7.095523  |
| C | 4.916584  | 5.380513  | 6.352876  |
| C | 5.196994  | 5.058985  | 5.020302  |
| C | 6.366423  | 5.596153  | 4.460274  |
| C | 7.214058  | 6.420399  | 5.190168  |
| C | 4.285858  | 4.163088  | 4.171873  |
| C | 3.064199  | 3.663969  | 4.955531  |
| C | 3.783510  | 4.960770  | 2.950426  |
| C | 5.082851  | 2.934974  | 3.686300  |
| H | 13.113323 | 9.844862  | 8.696813  |
| H | 15.282314 | 10.497178 | 7.749374  |
| H | 16.875666 | 11.874255 | 9.107453  |
| H | 16.228907 | 12.575204 | 11.377464 |
| H | 12.731205 | 12.598169 | 15.120333 |
| H | 10.531258 | 11.864148 | 15.947542 |
| H | 9.097082  | 10.412404 | 14.493205 |
| H | 15.030532 | 10.460031 | 13.770773 |
| H | 14.827645 | 11.903942 | 14.785946 |
| H | 16.036285 | 11.897275 | 13.487981 |
| H | 13.260170 | 14.062773 | 12.103601 |
| H | 14.989573 | 14.025572 | 12.507152 |
| H | 13.778975 | 14.030704 | 13.802365 |
| H | 10.831671 | 6.305779  | 9.581225  |
| H | 12.307917 | 7.807848  | 10.953329 |
| H | 10.712501 | 12.239176 | 10.049759 |
| H | 8.883612  | 13.162642 | 8.661570  |
| H | 7.397789  | 11.622473 | 7.353761  |
| H | 5.521380  | 6.447228  | 8.130540  |



|   |           |           |           |
|---|-----------|-----------|-----------|
| H | 4.023703  | 4.988393  | 6.834797  |
| H | 6.626195  | 5.371253  | 3.426104  |
| H | 8.114771  | 6.829823  | 4.734705  |
| H | 2.433579  | 4.493559  | 5.302512  |
| H | 3.355035  | 3.063247  | 5.827826  |
| H | 2.446809  | 3.028374  | 4.306919  |
| H | 3.206548  | 5.840103  | 3.266080  |
| H | 3.134474  | 4.330308  | 2.326368  |
| H | 4.613418  | 5.311455  | 2.324092  |
| H | 5.449041  | 2.343460  | 4.535946  |
| H | 5.950701  | 3.225175  | 3.080921  |
| H | 4.443817  | 2.288426  | 3.068486  |
| H | 9.886614  | 9.751833  | 12.265159 |
| O | 8.984685  | 5.785598  | 7.984328  |
| O | 6.576929  | 9.409032  | 6.541580  |
| N | 12.182978 | 10.434629 | 11.115363 |
| N | 7.773293  | 7.597341  | 7.273326  |

**Supplementary Figure 13.** Optimized cartesian coordinates of the NAI-DMAC gas phase molecule in the ground state at PBE level of theory.

### S15. Cartesian coordinates of the $S_0$ optimized structure of the NAI-DMAC in the high packing fraction limit

292

XYZ file

```
C -0.101602 0.673916 10.442055
C 5.878693 9.339025 10.509105
C -1.395338 3.810979 6.686170
C 7.168510 6.200158 14.262384
C -0.120497 2.585933 8.370012
C 5.894039 7.426208 12.580130
C 0.984849 4.284592 6.992564
C 4.788588 5.725380 13.956520
C -0.261943 2.041839 10.755791
C 6.038618 7.971526 10.194086
C -0.287664 3.019859 9.715180
C 6.064117 6.993341 11.234644
C -1.507894 4.846578 5.736297
C 7.281859 5.164161 15.212204
C 0.924470 5.368347 6.095608
C 4.849761 4.641445 14.852893
C -0.427893 2.453009 12.097097
C 6.203076 7.561418 8.852092
C 7.830980 3.028326 7.001030
C -2.057655 6.982811 13.947100
C -0.391062 1.469798 13.189107
C 6.162329 8.543878 7.759870
C 2.211164 3.936923 7.583125
C 3.562220 6.072679 13.366699
C 6.609856 3.246876 6.378189
C -0.836314 6.764155 14.569783
C -0.139703 -0.356922 11.502408
C 5.916818 10.370598 9.449533
C 0.033917 1.242353 8.089548
C 5.739943 8.769419 12.861123
C -3.052667 10.376795 16.081114
C 8.830549 -0.364759 4.868975
C 6.198949 9.297480 0.316464
C -0.420273 0.711487 20.635212
C 4.311494 -1.804750 18.178244
C 1.464864 11.813241 2.769200
C -0.514787 4.369790 10.061791
C 6.292139 5.643410 10.887303
C 4.420383 -1.030035 16.929384
C 1.351090 11.034610 4.014883
C 2.175987 9.004744 16.899750
C 3.603482 1.000519 4.052455
C 4.186333 -0.970238 14.509775
C 1.583399 10.971849 6.435340
C 2.098289 6.091301 5.862770
C 3.675889 3.918301 15.085943
C 6.202494 8.705277 1.592839
C -0.424348 1.303637 19.358837
C 2.277272 8.936533 19.357248
C 3.501880 1.074074 1.594956
C -0.663059 3.782303 12.400739
C 6.441259 6.232750 8.548345
C 4.373868 0.587660 12.181395
C 1.401892 9.423000 8.768482
C -1.880380 10.248945 15.329893
C 7.657913 -0.234740 5.619349
```

|   |           |           |           |
|---|-----------|-----------|-----------|
| C | 2.245733  | 7.513576  | 19.285280 |
| C | 3.533631  | 2.497032  | 1.668512  |
| C | 2.230545  | 6.881685  | 18.052298 |
| C | 3.548977  | 3.126223  | 2.902553  |
| C | 0.027673  | 0.290363  | 9.119327  |
| C | 5.748410  | 9.722361  | 11.831715 |
| C | 2.287802  | 9.677699  | 18.137497 |
| C | 3.490767  | 0.330580  | 2.813651  |
| C | 1.098887  | 6.005156  | 20.845297 |
| C | 4.679524  | 4.005187  | 0.105851  |
| C | -0.365349 | 5.803270  | 5.411382  |
| C | 6.139738  | 4.207232  | 15.538019 |
| C | 7.604201  | 5.032849  | 5.122451  |
| C | -1.830109 | 4.979018  | 15.826050 |
| C | -0.624853 | -0.831594 | 13.882435 |
| C | 6.398184  | 10.844847 | 7.067707  |
| C | 0.289989  | -1.814276 | 14.238995 |
| C | 5.486094  | 11.829275 | 6.709983  |
| C | 4.883414  | 8.406504  | 2.292941  |
| C | 0.893780  | 1.603151  | 18.657677 |
| C | 3.359653  | 0.807268  | 13.118144 |
| C | 2.415795  | 9.202386  | 7.832368  |
| C | 2.045439  | 9.767765  | 15.645177 |
| C | 3.731014  | 0.231624  | 5.304488  |
| C | 2.292777  | 9.649282  | 20.577532 |
| C | 3.484417  | 0.363918  | 0.373086  |
| C | 3.358473  | 4.673008  | 7.323828  |
| C | 2.415006  | 5.337038  | 13.625784 |
| C | 2.170537  | 7.620469  | 16.863237 |
| C | 3.610361  | 2.384846  | 4.091085  |
| C | 3.806473  | 8.116065  | 1.248874  |
| C | 1.971144  | 1.894198  | 19.702272 |
| C | -3.391869 | 9.460630  | 17.258533 |
| C | 9.169328  | 0.550189  | 3.689969  |
| C | -1.810051 | -0.692949 | 14.605873 |
| C | 7.585393  | 10.705991 | 6.346967  |
| C | 3.258051  | 0.035728  | 14.273550 |
| C | 2.515280  | 9.969958  | 6.674528  |
| C | -0.713913 | 4.735351  | 11.375140 |
| C | 6.493065  | 5.279225  | 9.573361  |
| C | 6.492432  | 4.256017  | 5.425141  |
| C | -0.718307 | 5.755278  | 15.522990 |
| C | 3.309575  | 5.766862  | 6.462328  |
| C | 2.464549  | 4.243216  | 14.486385 |
| C | 4.267001  | -1.864547 | 20.590233 |
| C | 1.510902  | 11.877853 | 0.357210  |
| C | -2.065591 | -1.521111 | 15.687882 |
| C | 7.842414  | 11.532936 | 5.264271  |
| C | 4.667248  | 6.901159  | 20.559011 |
| C | 1.111110  | 3.107702  | 0.392136  |
| C | 5.189156  | -1.222655 | 13.582180 |
| C | 0.583254  | 11.228341 | 7.364046  |
| C | 4.525737  | 1.422701  | 10.914042 |
| C | 1.250547  | 8.588541  | 10.036391 |
| C | -0.000743 | 5.901543  | 19.977446 |
| C | 5.779789  | 4.109435  | 0.972644  |
| C | 4.357924  | -1.141162 | 19.392176 |
| C | 1.418825  | 11.152775 | 1.554209  |
| C | 5.272618  | -0.455878 | 12.430584 |
| C | 0.502396  | 10.465691 | 8.518711  |
| C | 2.702609  | 7.308731  | 1.533042  |
| C | 3.074373  | 2.701723  | 19.416517 |

|   |           |           |           |
|---|-----------|-----------|-----------|
| C | -1.092436 | 5.105292  | 20.303947 |
| C | 6.870635  | 4.906376  | 0.644554  |
| C | -0.747044 | 7.216755  | 5.914630  |
| C | 6.522121  | 2.793270  | 15.036253 |
| C | 7.435477  | 8.511651  | 2.219914  |
| C | -1.657225 | 1.496786  | 18.731762 |
| C | 3.764050  | 2.750936  | 11.019639 |
| C | 2.012033  | 7.259989  | 9.930555  |
| C | 5.017613  | 7.258189  | 3.301023  |
| C | 0.758840  | 2.751465  | 17.649065 |
| C | 8.619299  | 9.453058  | 0.358798  |
| C | -2.840994 | 0.555380  | 20.592348 |
| C | -0.135737 | 5.860482  | 3.883647  |
| C | 5.910604  | 4.152197  | 17.065912 |
| C | 4.473831  | 9.676794  | 3.080356  |
| C | 1.303892  | 0.333126  | 17.870260 |
| C | -2.213762 | 8.563251  | 17.650124 |
| C | 7.990935  | 1.447144  | 3.298907  |
| C | -3.806533 | 10.294190 | 18.485165 |
| C | 9.583091  | -0.284218 | 2.463865  |
| C | 1.635259  | 7.159339  | 0.653021  |
| C | 4.142359  | 2.851480  | 20.295481 |
| C | 5.786405  | 8.556372  | 16.844715 |
| C | -0.009211 | 1.454553  | 4.103785  |
| C | 3.984926  | 0.612632  | 9.720472  |
| C | 1.792109  | 9.398505  | 11.229723 |
| C | 8.639726  | 8.878107  | 1.625648  |
| C | -2.861579 | 1.130596  | 19.324970 |
| C | 6.015805  | 1.716924  | 10.666450 |
| C | -0.239402 | 8.295012  | 10.284236 |
| H | 7.920041  | 2.227680  | 7.730766  |
| H | -2.146557 | 7.783403  | 13.217471 |
| H | 2.261489  | 3.082302  | 8.251476  |
| H | 3.511948  | 6.929258  | 12.699988 |
| H | 5.756876  | 2.617684  | 6.632194  |
| H | 0.016720  | 7.393399  | 14.315566 |
| H | 0.132556  | 0.922200  | 7.054477  |
| H | 5.639293  | 9.088566  | 13.896881 |
| H | -0.551088 | 5.118576  | 9.273846  |
| H | 6.326379  | 4.894104  | 11.674337 |
| H | 2.050663  | 6.960474  | 5.207649  |
| H | 3.723144  | 3.049392  | 15.741382 |
| H | -0.826311 | 4.069117  | 13.438191 |
| H | 6.604669  | 5.946677  | 7.510628  |
| H | -1.151174 | 9.485078  | 15.585486 |
| H | 6.929056  | 0.528492  | 5.361639  |
| H | 2.249384  | 5.793803  | 18.017902 |
| H | 3.528339  | 4.214212  | 2.940124  |
| H | 0.097683  | -0.766986 | 8.883843  |
| H | 5.676706  | 10.779499 | 12.068415 |
| H | 7.497224  | 5.836140  | 4.396420  |
| H | -1.723215 | 4.176425  | 16.553139 |
| H | -0.681794 | 10.948306 | 13.681718 |
| H | 6.458617  | -0.932619 | 7.267736  |
| H | 2.646415  | 1.614793  | 12.972303 |
| H | 3.131149  | 8.396767  | 7.981067  |
| H | 4.979195  | 11.848167 | 0.658842  |
| H | 0.797470  | -1.832797 | 20.293364 |
| H | 4.292801  | 4.390957  | 7.803792  |
| H | 1.479895  | 5.620021  | 13.147355 |
| H | 2.139844  | 7.117486  | 15.897489 |
| H | 3.641054  | 2.887564  | 5.056833  |

|   |           |           |           |
|---|-----------|-----------|-----------|
| H | 7.824585  | 0.076475  | 14.330542 |
| H | -2.048026 | 9.937414  | 6.622669  |
| H | 2.466495  | 0.235228  | 14.993072 |
| H | 3.308159  | 9.772522  | 5.955905  |
| H | -0.926274 | 5.770572  | 11.626394 |
| H | 6.704156  | 4.243846  | 9.321472  |
| H | 5.540813  | 4.457633  | 4.939885  |
| H | 0.233153  | 5.554540  | 16.008615 |
| H | 4.198765  | 6.363721  | 6.264416  |
| H | 1.575360  | 3.646304  | 14.685250 |
| H | 6.999987  | 1.427035  | 0.683713  |
| H | -1.222084 | 8.587699  | 20.263201 |
| H | 7.361026  | -1.375059 | 16.241453 |
| H | -1.584996 | 11.384978 | 4.710222  |
| H | 4.655976  | 7.337677  | 19.564157 |
| H | 1.121853  | 2.671131  | 1.387519  |
| H | 4.005988  | 10.869459 | 13.769297 |
| H | 1.767343  | -0.863032 | 7.177246  |
| H | -0.001272 | 6.435112  | 19.031277 |
| H | 5.780424  | 3.577082  | 1.919342  |
| H | 4.444932  | -0.056349 | 19.399584 |
| H | 1.330982  | 10.067803 | 1.545743  |
| H | 6.057080  | -0.668607 | 11.707093 |
| H | -0.280098 | 10.681066 | 9.243683  |
| H | 2.659217  | 6.794895  | 2.489795  |
| H | 3.116337  | 3.215554  | 18.459236 |
| H | -1.922715 | 5.022398  | 19.604376 |
| H | 7.701311  | 4.989986  | 1.344126  |
| H | 7.454686  | 8.086680  | 3.221118  |
| H | -1.676275 | 1.922245  | 17.730558 |
| H | -3.548453 | 6.988261  | 20.719353 |
| H | 9.326652  | 3.020388  | 0.231266  |
| H | 0.796513  | 6.515119  | 0.909672  |
| H | 4.980036  | 3.497076  | 20.038830 |
| H | -0.773768 | 8.727979  | 2.155355  |
| H | 6.551967  | 1.281940  | 18.795792 |
| H | 0.042276  | 7.943998  | 5.688671  |
| H | 5.732959  | 2.066181  | 15.262212 |
| H | -0.907755 | 7.206489  | 7.000501  |
| H | 6.683203  | 2.802796  | 13.950487 |
| H | -1.675803 | 7.559291  | 5.441545  |
| H | 7.450933  | 2.451422  | 15.509496 |
| H | 3.999848  | 3.392929  | 10.161806 |
| H | 1.776234  | 6.617890  | 10.788018 |
| H | 4.027527  | 3.306043  | 11.929401 |
| H | 1.748503  | 6.705252  | 9.020371  |
| H | 2.677107  | 2.600650  | 11.024984 |
| H | 3.098817  | 7.410248  | 9.924734  |
| H | 5.334956  | 6.330277  | 2.809418  |
| H | 0.441333  | 3.679113  | 18.140671 |
| H | 4.064671  | 7.074459  | 3.808504  |
| H | 1.711359  | 2.935619  | 17.141584 |
| H | 5.727383  | 7.512522  | 4.094260  |
| H | 0.048684  | 2.496402  | 16.856358 |
| H | 0.219447  | 4.893675  | 3.504757  |
| H | 5.556001  | 5.119295  | 17.443745 |
| H | 0.606538  | 6.627622  | 3.635992  |
| H | 5.168322  | 3.385420  | 17.315155 |
| H | -1.055660 | 6.123422  | 3.348120  |
| H | 6.830738  | 3.889726  | 17.601439 |
| H | 4.353602  | 10.541046 | 2.414651  |
| H | 1.424015  | -0.531021 | 18.534908 |

|   |           |           |           |
|---|-----------|-----------|-----------|
| H | 5.238746  | 9.920533  | 3.828613  |
| H | 0.538702  | 0.089704  | 17.122005 |
| H | 3.516814  | 9.503964  | 3.585721  |
| H | 2.260645  | 0.506166  | 17.364368 |
| H | -1.895727 | 7.911570  | 16.828312 |
| H | 7.673137  | 2.099090  | 4.120719  |
| H | -2.515975 | 7.911517  | 18.480932 |
| H | 8.292852  | 2.099090  | 2.468098  |
| H | -1.346441 | 9.154501  | 17.975039 |
| H | 7.123709  | 0.856053  | 2.973992  |
| H | -1.111643 | -1.907411 | 18.788383 |
| H | 6.887726  | 11.917912 | 2.161176  |
| H | -4.027623 | 9.632824  | 19.334496 |
| H | 9.804023  | 0.376619  | 1.614006  |
| H | 7.548461  | -1.990492 | 18.299423 |
| H | -1.772008 | 11.999988 | 2.649606  |
| H | 4.907653  | 9.145611  | 16.561077 |
| H | 0.869435  | 0.865578  | 4.387953  |
| H | 5.495939  | 7.901515  | 17.677641 |
| H | 0.281360  | 2.109674  | 3.271919  |
| H | 6.058719  | 7.915750  | 15.998562 |
| H | -0.282160 | 2.094857  | 4.950469  |
| H | 4.136535  | 1.144984  | 8.773245  |
| H | 1.640765  | 8.866576  | 12.176950 |
| H | 2.910789  | 0.418424  | 9.830541  |
| H | 2.866153  | 9.592713  | 11.118595 |
| H | 4.487379  | -0.358832 | 9.631041  |
| H | 1.289920  | 10.370445 | 11.318783 |
| H | 6.575301  | 0.811602  | 10.406815 |
| H | -0.798742 | 9.200222  | 10.543930 |
| H | 6.496933  | 2.175721  | 11.542096 |
| H | -0.720850 | 7.836358  | 9.408787  |
| H | 6.106503  | 2.408130  | 9.821016  |
| H | -0.330420 | 7.603642  | 11.129443 |
| O | 4.710301  | 0.161143  | 16.907160 |
| O | 1.059514  | 9.843696  | 4.032875  |
| O | 1.765981  | 9.241604  | 14.572641 |
| O | 4.012536  | 0.748630  | 6.380306  |
| O | -0.380849 | 1.794184  | 14.372506 |
| O | 6.157408  | 8.219583  | 6.576630  |
| O | -1.882497 | 11.339368 | 11.276290 |
| O | 5.773818  | 11.565216 | 9.678667  |
| N | 2.237107  | 6.755847  | 20.491804 |
| N | 3.542098  | 3.253755  | 0.460929  |
| N | -0.168652 | 3.548507  | 7.312716  |
| N | 5.940924  | 6.463159  | 13.637214 |
| N | -0.386511 | 0.105579  | 12.815349 |
| N | 6.151270  | 9.907621  | 8.133999  |
| N | 4.155270  | -1.730136 | 15.732915 |
| N | 1.614092  | 11.731377 | 5.212411  |

**Supplementary Figure 14.** Optimized cartesian coordinates of the NAI-DMAC crystal in the ground state at PBE level of theory.

## References

1. N. Michaud-Agrawal, E. J. Denning, T. B. Woolf and O. Beckstein, *Journal of Computational Chemistry*, 2011, **32**, 2319-2327.
2. A. Grossfield, P. N. Patrone, D. R. Roe, A. J. Schultz, D. W. Siderius and D. M. Zuckerman, *Living journal of computational molecular science*, 2018, **1**.
3. M. Brehm and B. Kirchner, *Journal of Chemical Information and Modeling*, 2011, **51**, 2007-2023.
4. M. Brehm, M. Thomas, S. Gehrke and B. Kirchner, *The Journal of Chemical Physics*, 2020, **152**, 164105.
5. M. Thomas, M. Brehm, R. Fligg, P. Vöhringer and B. Kirchner, *Physical Chemistry Chemical Physics*, 2013, **15**, 6608.
6. F. Neese, *Wiley Interdisciplinary Reviews: Computational Molecular Science*, 2012, **2**, 73-78.
7. T. Chen, C.-H. Lu, C.-W. Huang, X. Zeng, J. Gao, Z. Chen, Y. Xiang, W. Zeng, Z. Huang and S. Gong, *Journal of Materials Chemistry C*, 2019, **7**, 9087-9094.
